# Supplementary material
Source: MDPI journal article supplement (https://www.mdpi.com/2312-7481/9/8/194)
Supplement: s1 [file s1]

# Supplementary Materials

## Magnetic, Optical, and Thermic Properties of SrLnCuSe<sub>3</sub> (Ln = Dy, Ho, Er, Tm) Compounds

Navruzbek N. Habibullayev <sup>1,\*</sup>, Nikolay G. Naumov <sup>2</sup>, Alexander N. Lavrov <sup>2</sup>, Natalia V. Kuratieva <sup>2</sup>, Aleksandr S. Aleksandrovsky <sup>3,4</sup>, Aleksandr S. Oreshonkov <sup>3,4</sup>, Maxim S. Molokeev <sup>5,6,7</sup>, Irina V. Palamarchuk <sup>1</sup>, Ilya. O. Yurev <sup>1,8</sup>, Yuriy. G. Denisenko <sup>1,9</sup>, Oleg V. Andreev <sup>1,10</sup> and Alena D. Zakharova <sup>1</sup>

- <sup>1</sup> Institute of Chemistry, University of Tyumen, 625003 Tyumen, Russia; i.v.palamarchuk@utmn.ru (I.V.P.); i.o.yurev@utmn.ru (I.O.Y.); yu.g.denisenko@gmail.com (Y.G.D.); o.v.andreev@utmn.ru (O.V.A.); a.d.zakharova@utmn.ru (A.D.Z.)
- <sup>2</sup> Nikolaev Institute of Inorganic Chemistry SB RAS, 630090 Novosibirsk, Russia; naumov@niic.nsc.ru (N.G.N.); lavrov@niic.nsc.ru (A.N.L.); kuratieva@gmail.com (N.V.K.)
- <sup>3</sup> Kirensky Institute of Physics, Federal Research Center, KSC, SB RAS, 660036 Krasnoyarsk, Russia; aleksandrovsky@kirensky.ru (A.S.A.); oreshonkov@iph.krasn.ru (A.S.O.)
- <sup>4</sup> Department of Photonics and Laser Technology, Siberian Federal University, 660036 Krasnoyarsk, Russia
- <sup>5</sup> Laboratory of Crystal Physics, Kirensky Institute of Physics, Federal Research Center, KSC, SB RAS, 660036 Krasnoyarsk, Russia; msmolokeev@mail.ru
- <sup>6</sup> Laboratory of Theory and Optimization of Chemical and Technological Processes, University of Tyumen, 625003 Tyumen, Russia
- <sup>7</sup> Department of Physics, Far Eastern State Transport University, 680021 Khabarovsk, Russia
- <sup>8</sup> Department of Physical and Applied Chemistry, Kurgan State University, 640020 Kurgan, Russia
- <sup>9</sup> Department of General and Special Chemistry, Industrial University of Tyumen, 625000 Tyumen, Russia
- <sup>10</sup> Institute of Solid State Chemistry, UB RAS, 620990 Ekaterinburg, Russia
- \* Correspondence: habibullayev\_navruzbek@mail.ru

**Table S1.** Main parameters of processing and refinement of the SrTmCuSe<sub>3</sub> samples

| Compound                   | SrTmCuSe <sub>3</sub> |
|----------------------------|-----------------------|
| Sp. Gr.                    | <i>Cmcm</i>           |
| <i>a</i> (Å)               | 4.06935(6)            |
| <i>b</i> (Å)               | 13.4758(2)            |
| <i>c</i> (Å)               | 10.46441(15)          |
| <i>V</i> (Å <sup>3</sup> ) | 573.844(15)           |
| <i>Z</i>                   | 2                     |
| 2θ-interval, °             | 10-108                |
| <i>R</i> <sub>wp</sub> , % | 4.6                   |
| <i>R</i> <sub>p</sub> , %  | 3.35                  |
| χ <sup>2</sup>             | 1.99                  |
| <i>R</i> <sub>B</sub> , %  | 2.56                  |

**Table S2.** Fractional atomic coordinates and isotropic displacement parameters ( $\text{\AA}^2$ ) of  $\text{SrTmCuSe}_3$ 

| Ato<br>m | <i>x</i> | <i>y</i>    | <i>z</i>    | <i>B</i> <sub>iso</sub> | <i>Occ.</i> |
|----------|----------|-------------|-------------|-------------------------|-------------|
| Tm       | 0        | 0           | 0           | 1.99(14)                | 1           |
| Sr       | 0        | 0.74970(18) | 0.25        | 1.99(15)                | 1           |
| Cu       | 0        | 0.4692(3)   | 0.25        | 2.47(19)                | 1           |
| Se1      | 0        | 0.0763(2)   | 0.25        | 2.22(17)                | 1           |
| Se2      | 0        | 0.36198(18) | 0.06490(18) | 2.11(15)                | 1           |

**Table S3.** Main bond lengths ( $\text{\AA}$ ) of  $\text{SrTmCuSe}_3$ .

|                      |             |                      |            |
|----------------------|-------------|----------------------|------------|
| Tm—Se1               | 2.81090(98) | Tm—Se2 <sup>i</sup>  | 2.8391(16) |
| Sr—Se1 <sup>ii</sup> | 3.0984(27)  | Sr—Se2 <sup>ii</sup> | 3.1907(19) |
| Cu—Se1 <sup>ii</sup> | 2.4945(28)  | Cu—Se2               | 2.4165(31) |

Symmetry codes: (i)  $x+1/2, y+1/2, z$ ; (ii)  $x+1/2, y+1/2, z$

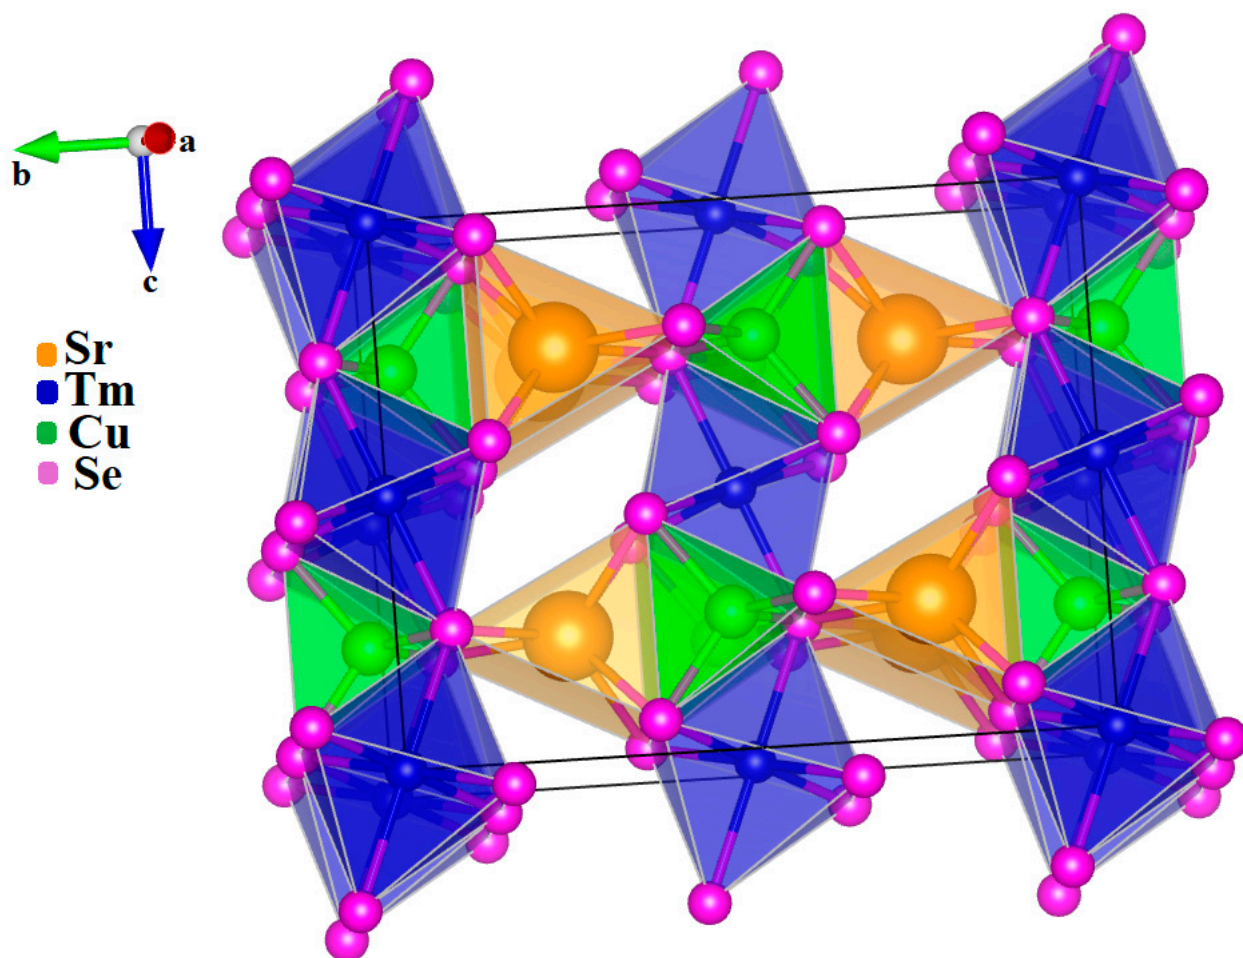**Figure S1.** Polyhedral structure of  $\text{SrTmCuSe}_3$ .

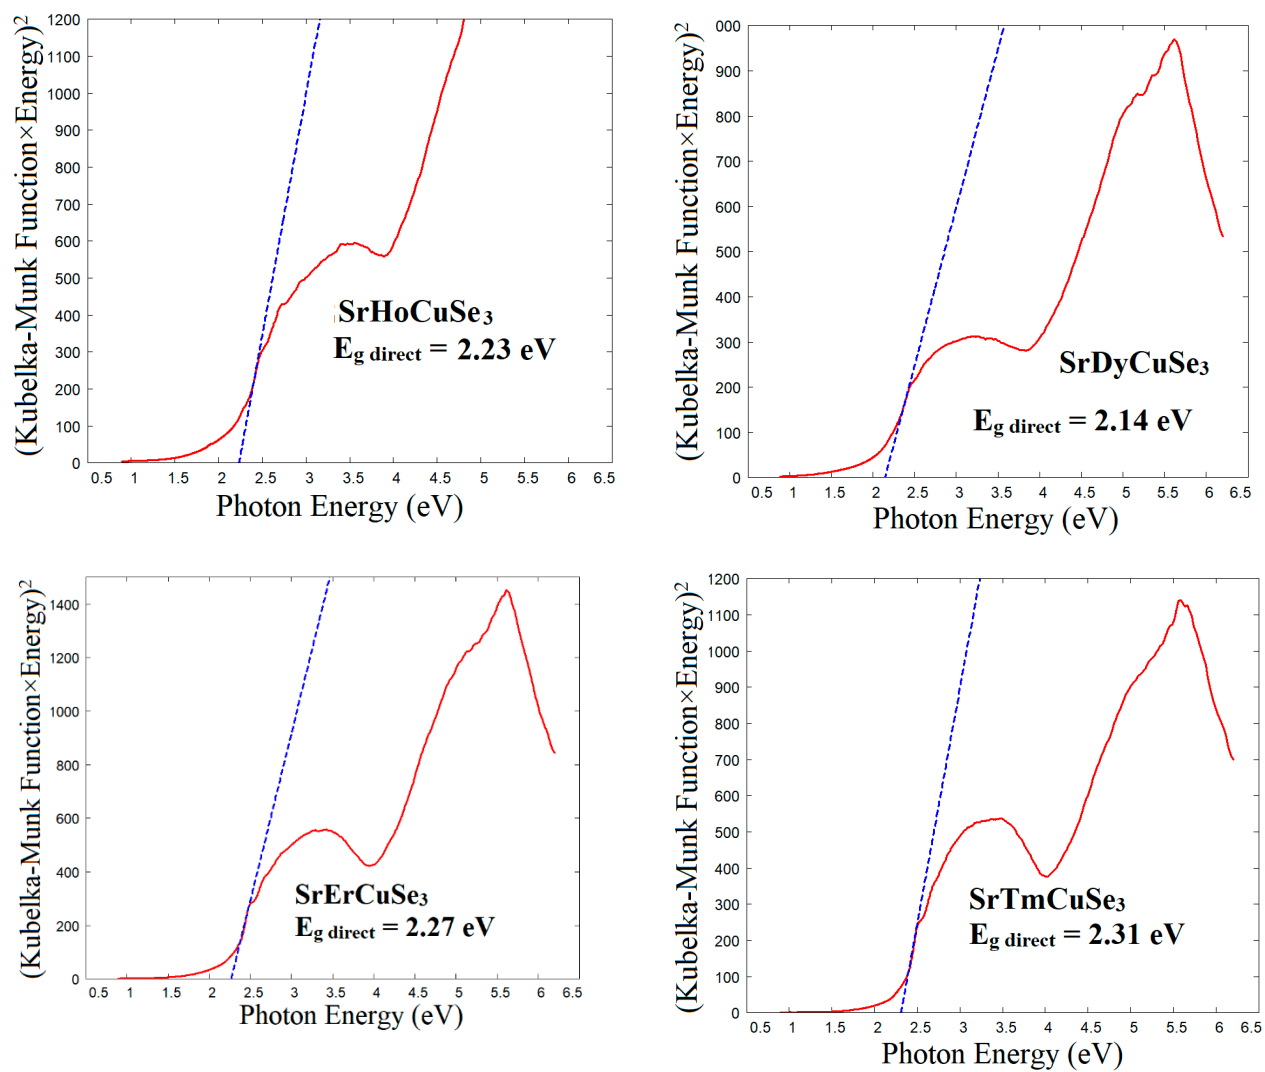

**Figure S2.** Kubelka-Munk Functions for determination of direct bandgaps in SrLnCuSe<sub>3</sub> crystals.

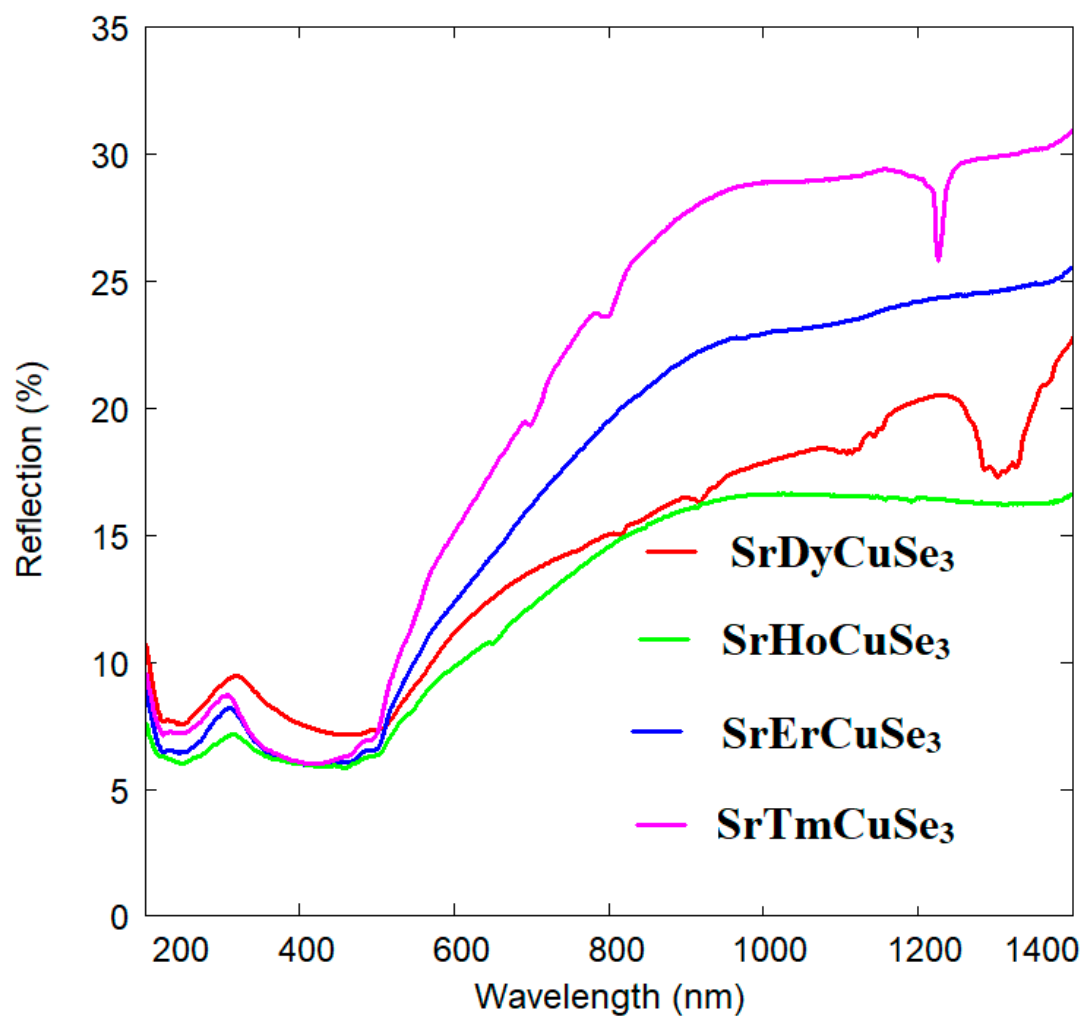

Figure S3. UV-vis-NIR diffuse reflectance spectra of quaternary rare earth selenides.

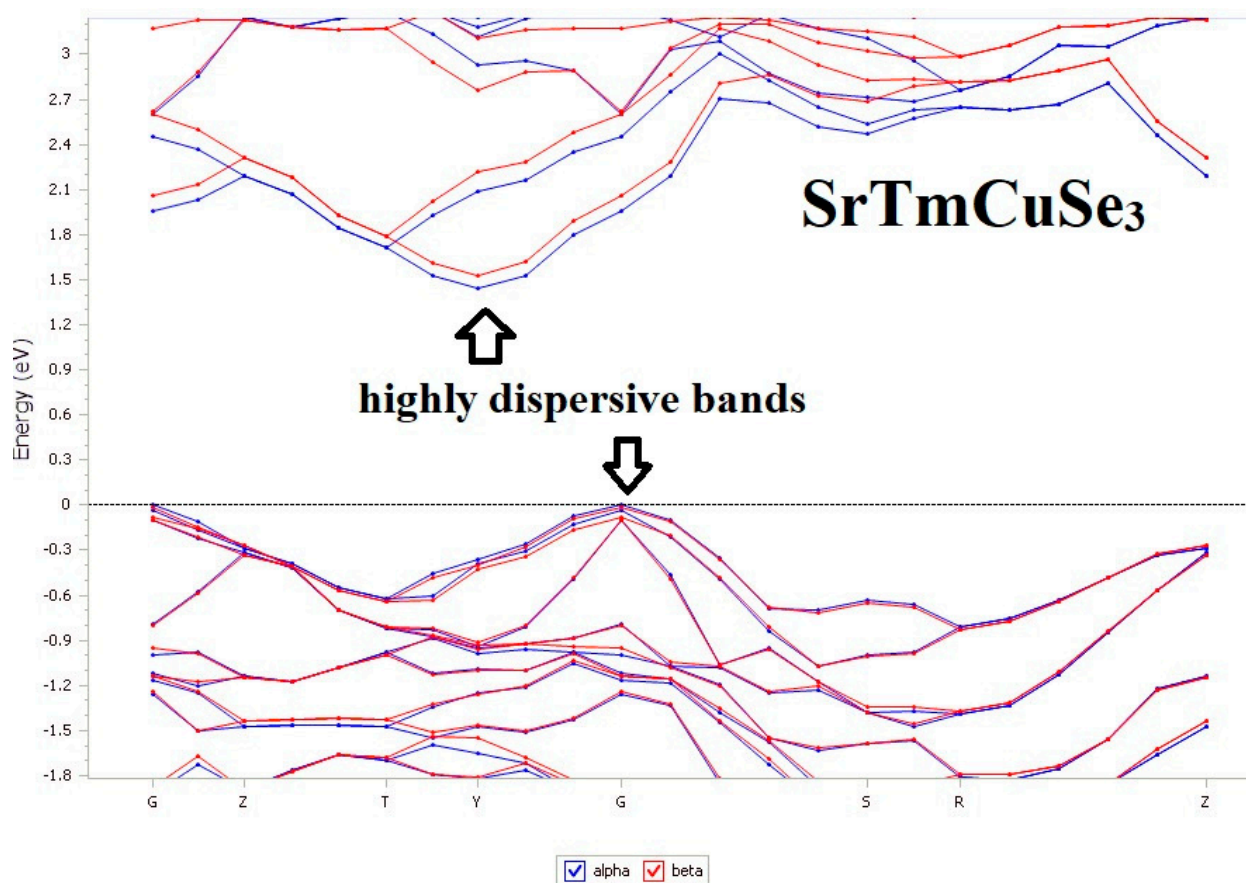

**Figure S4.** *Ab initio* DFT calculated band structure of SrTmCuSe<sub>3</sub> crystal. Indirect bandgap 1.35 eV.

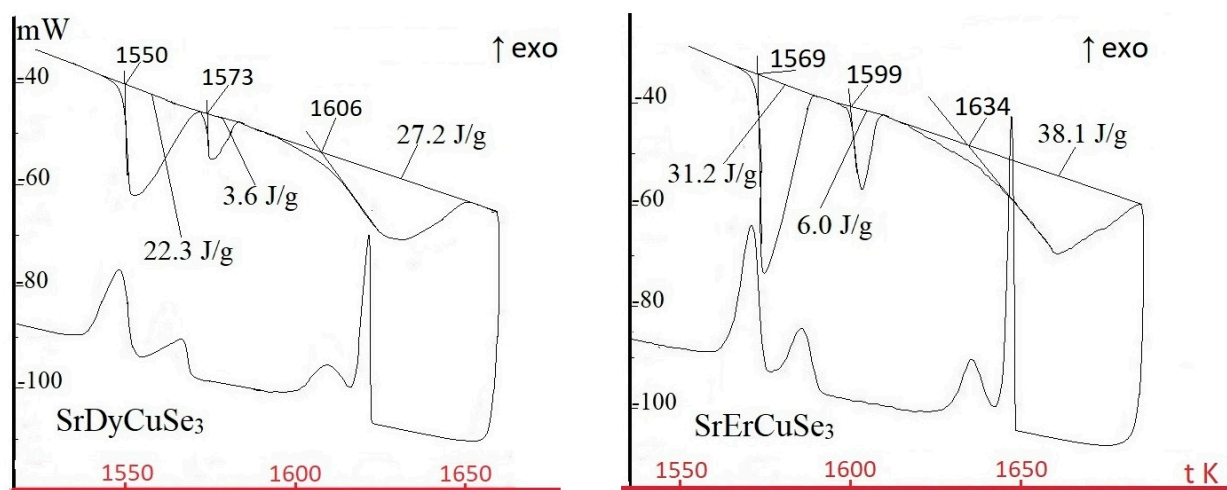

**Figure S5.** DSC/t dependences of "SETARAM" SETSYS Evolution for samples SrDyCuSe<sub>3</sub>, SrErCuSe<sub>3</sub> (the samples were in sealed quartz ampoules).

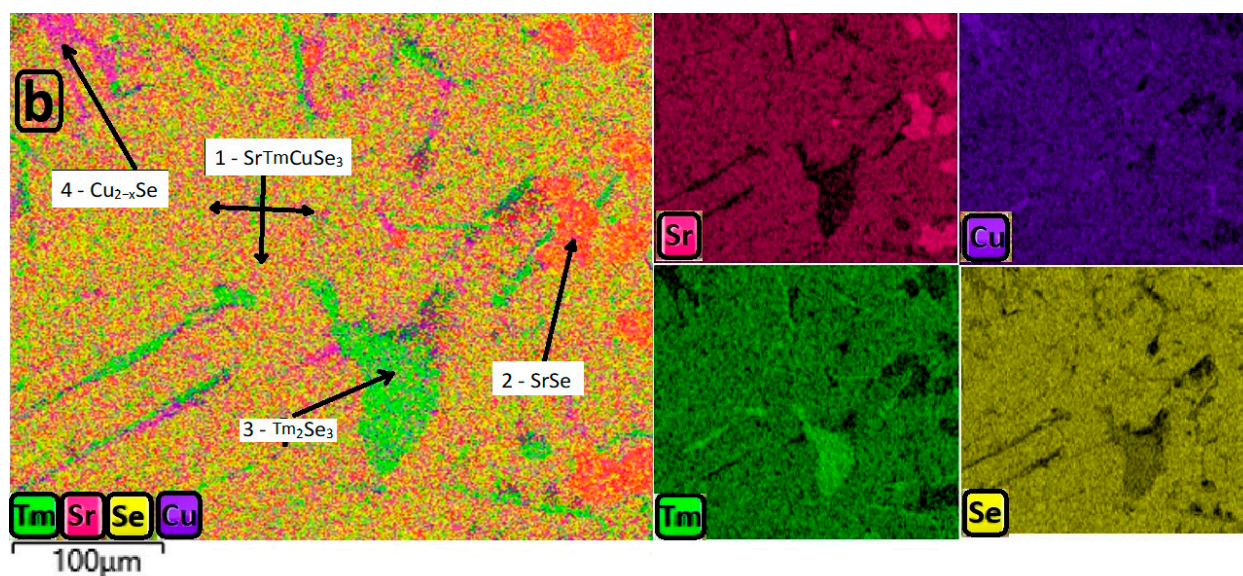

**Figure S6.** SEM/EDS maps of elemental distribution on the surface  $\text{SrTmCuSe}_3$  sample that were cooled after the DSC measurements (1800 K)
